# Supplementary material for: Early Allograft Dysfunction Is Associated With Higher Risk of Renal Nonrecovery After Liver Transplantation
Source: PubMed Central journal article supplement — Transplant Direct. 2018 Mar 14;4(4):e352. doi: 10.1097/TXD.0000000000000771 (PMC5908457; doi:10.1097/txd.0000000000000771), 2018-03-14
Supplement: txd-4-e352-s001.pdf [file txd-4-e352-s001.pdf]

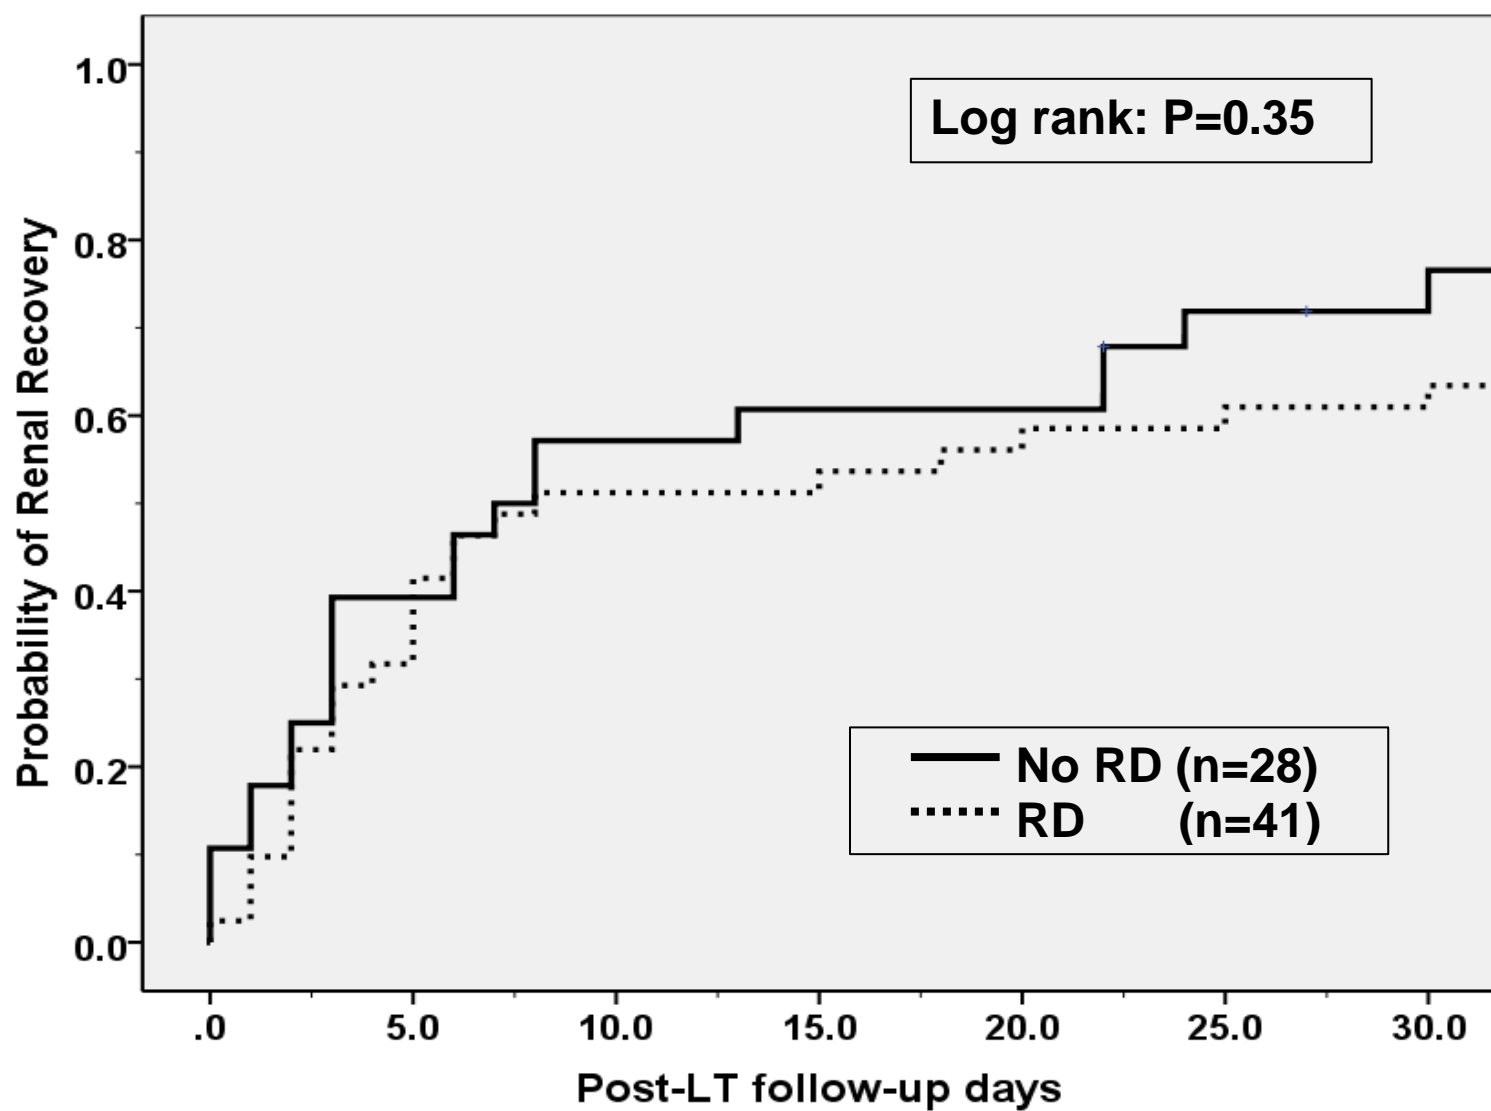

**Figure 1S:** Probability of renal recovery 30-days from LT in 69 LT recipients on RRT at time transplantation grouped by history of renal dysfunction (RD). As demonstrated, the 30-day probability of renal recovery was 76% in recipients with no RD compared to 64% in the no RD group ( $P=0.35$ ).

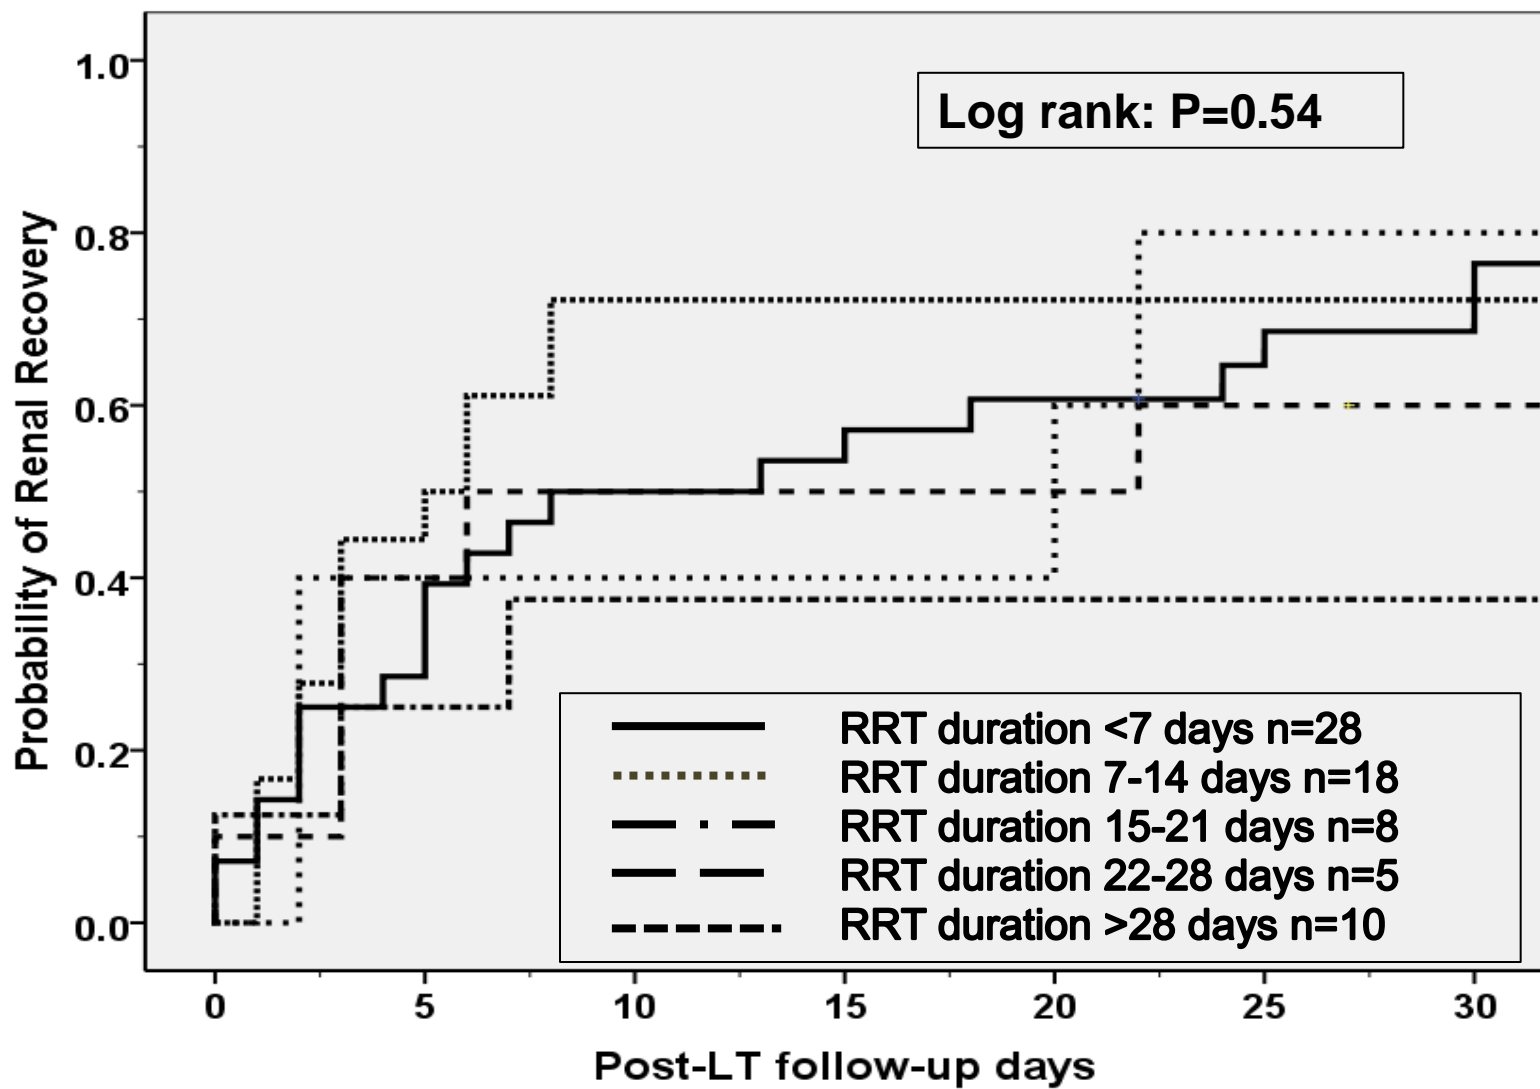

**Figure 2S:** Probability of renal recovery 30 days from LT in 69 LT recipients on RRT for a median (range) of 9 (1-41) days prior to LT grouped by RRT duration. The 69 recipients were divided into 5 different groups according to the duration of pre-LT RRT [<7 days (n=28), 7-14 days (n=18), 15-21 days (n=8), 22-28 days (n=5) and >28 days (n=10)]. As demonstrated, the pre-LT duration of RRT did not impact 30-day post-LT renal recovery, P=0.54.
